# Supplementary material for: Unusual silver nanostructures prepared by aerosol spray pyrolysis
Source: Royal Society of Chemistry journal article supplement (doi:10.1039/c3ce41077c), 2013-01-01
Supplement: c3ce41077c.pdf [file c3ce41077c.pdf]

## Supporting materials (CrystEngComm):

### Unusual silver nanostructures prepared by Aerosol Spray Pyrolysis

Anna A. Semenova<sup>a</sup>, Vladimir K. Ivanov<sup>b</sup>, Sergey V. Savilov<sup>c</sup>, Eugene A. Goodilin<sup>a,b,c,\*</sup>

<sup>a</sup>Department of Materials Science, Moscow State University, Lenin Hills, Moscow 119991, Russia,

\* - corresponding author, e-mail: [goodilin@inorg.chem.msu.ru](mailto:goodilin@inorg.chem.msu.ru); Tel. +7 495 9394609

<sup>b</sup>Kurnakov's Institute of General and Inorganic Chemistry of RAS, Moscow, Leninskiy prospect

<sup>c</sup>Faculty of Chemistry, Moscow State University, Moscow, Russia, 119992

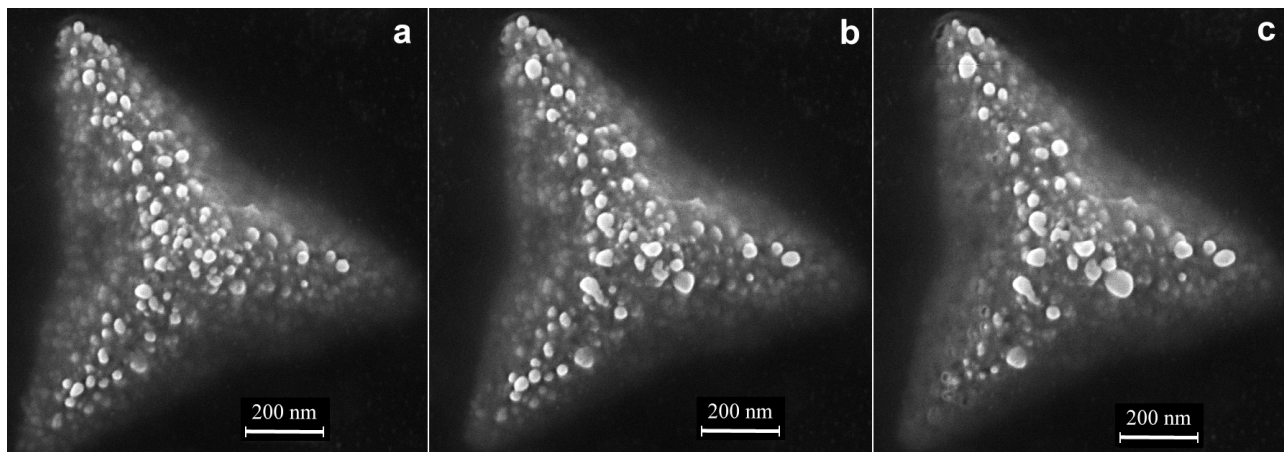

**Fig.S1.** Micrographs of a starfish nanoparticle held under the beam of electron microscope, a – original image, b, c – the same after 10 and 20 sec. of holding in the view field of the SEM microscope, respectively.

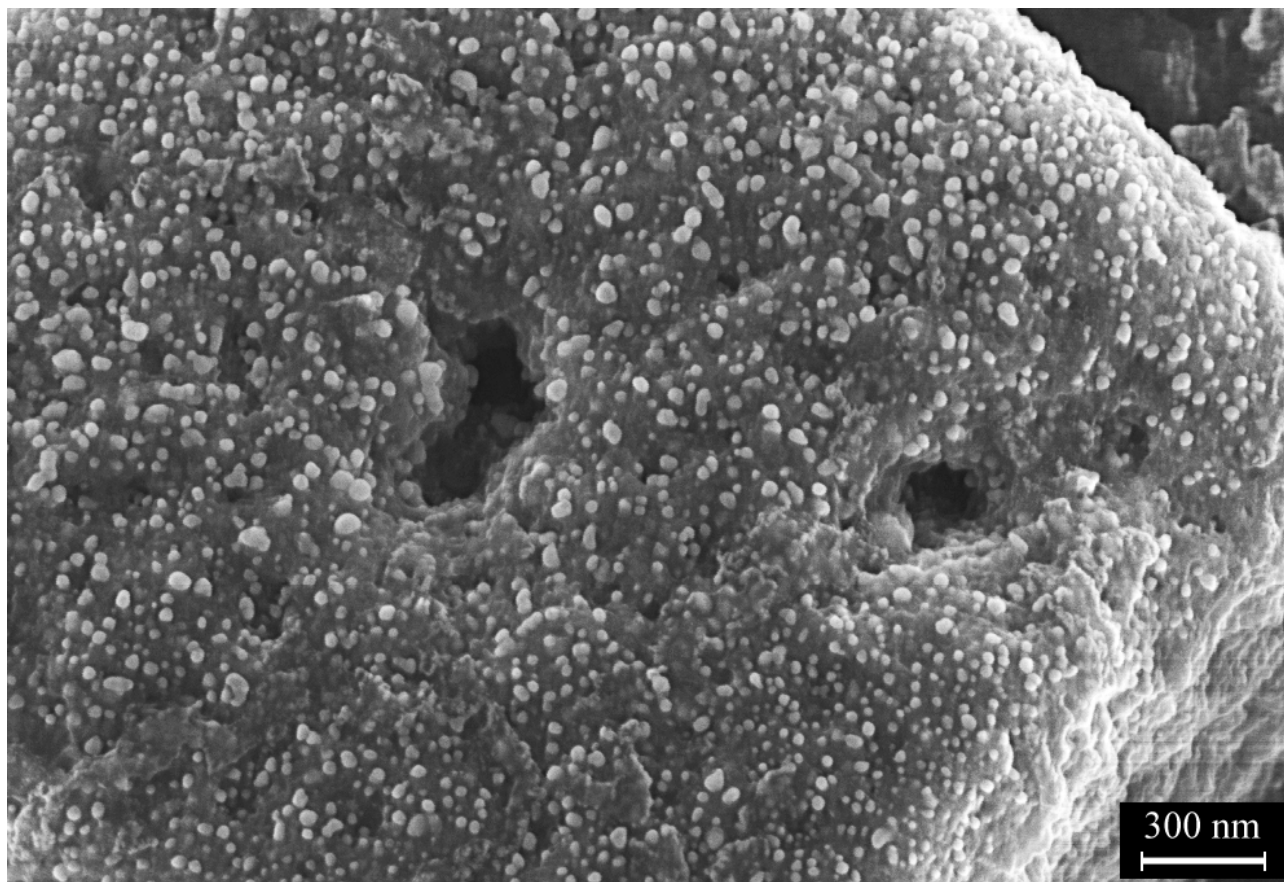

**Fig.S2.** A magnified view of a cuboid superficially decorated with silver nanoparticles.

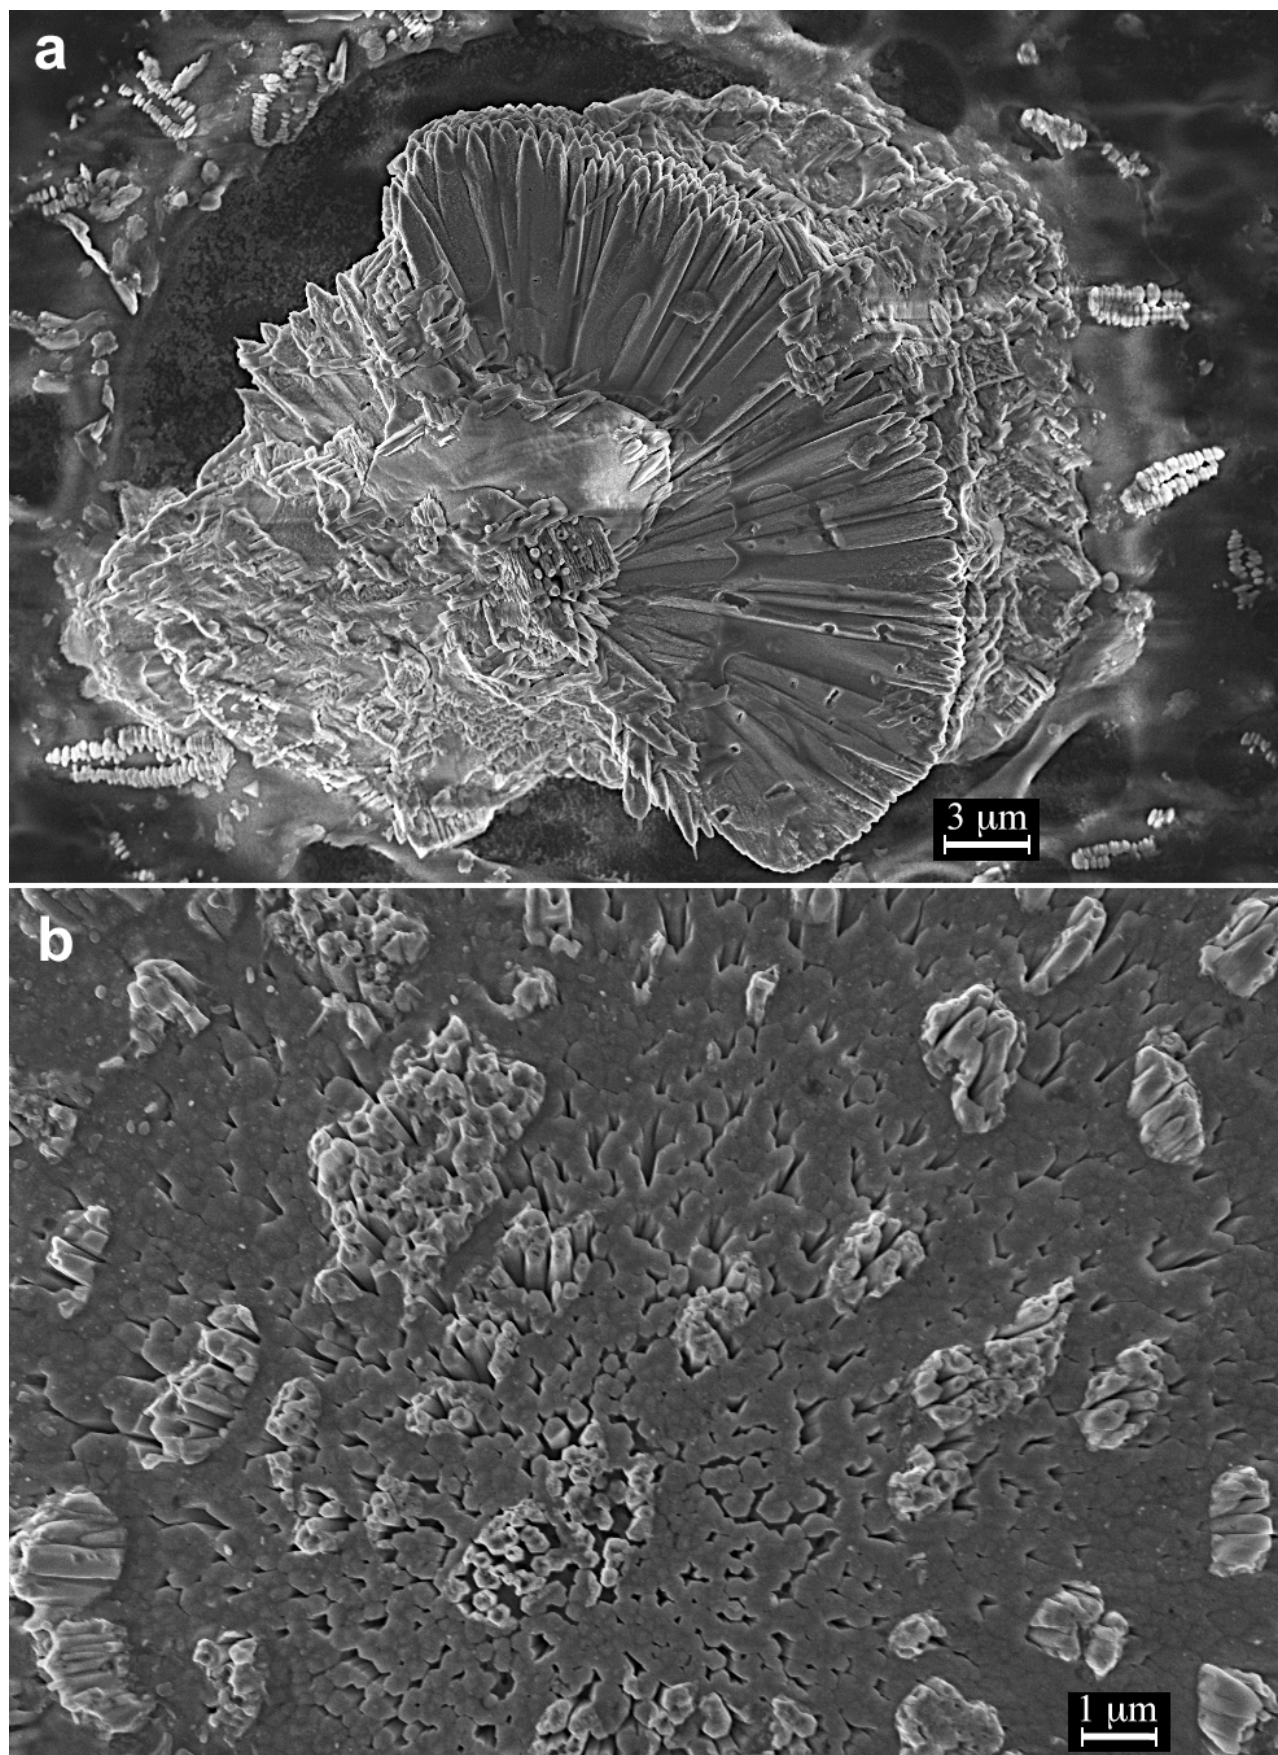

**Fig.S3.** Columnal growth of particles in the condensation zone. a – the resulting structure, b – a magnified view of the beginning of growth.

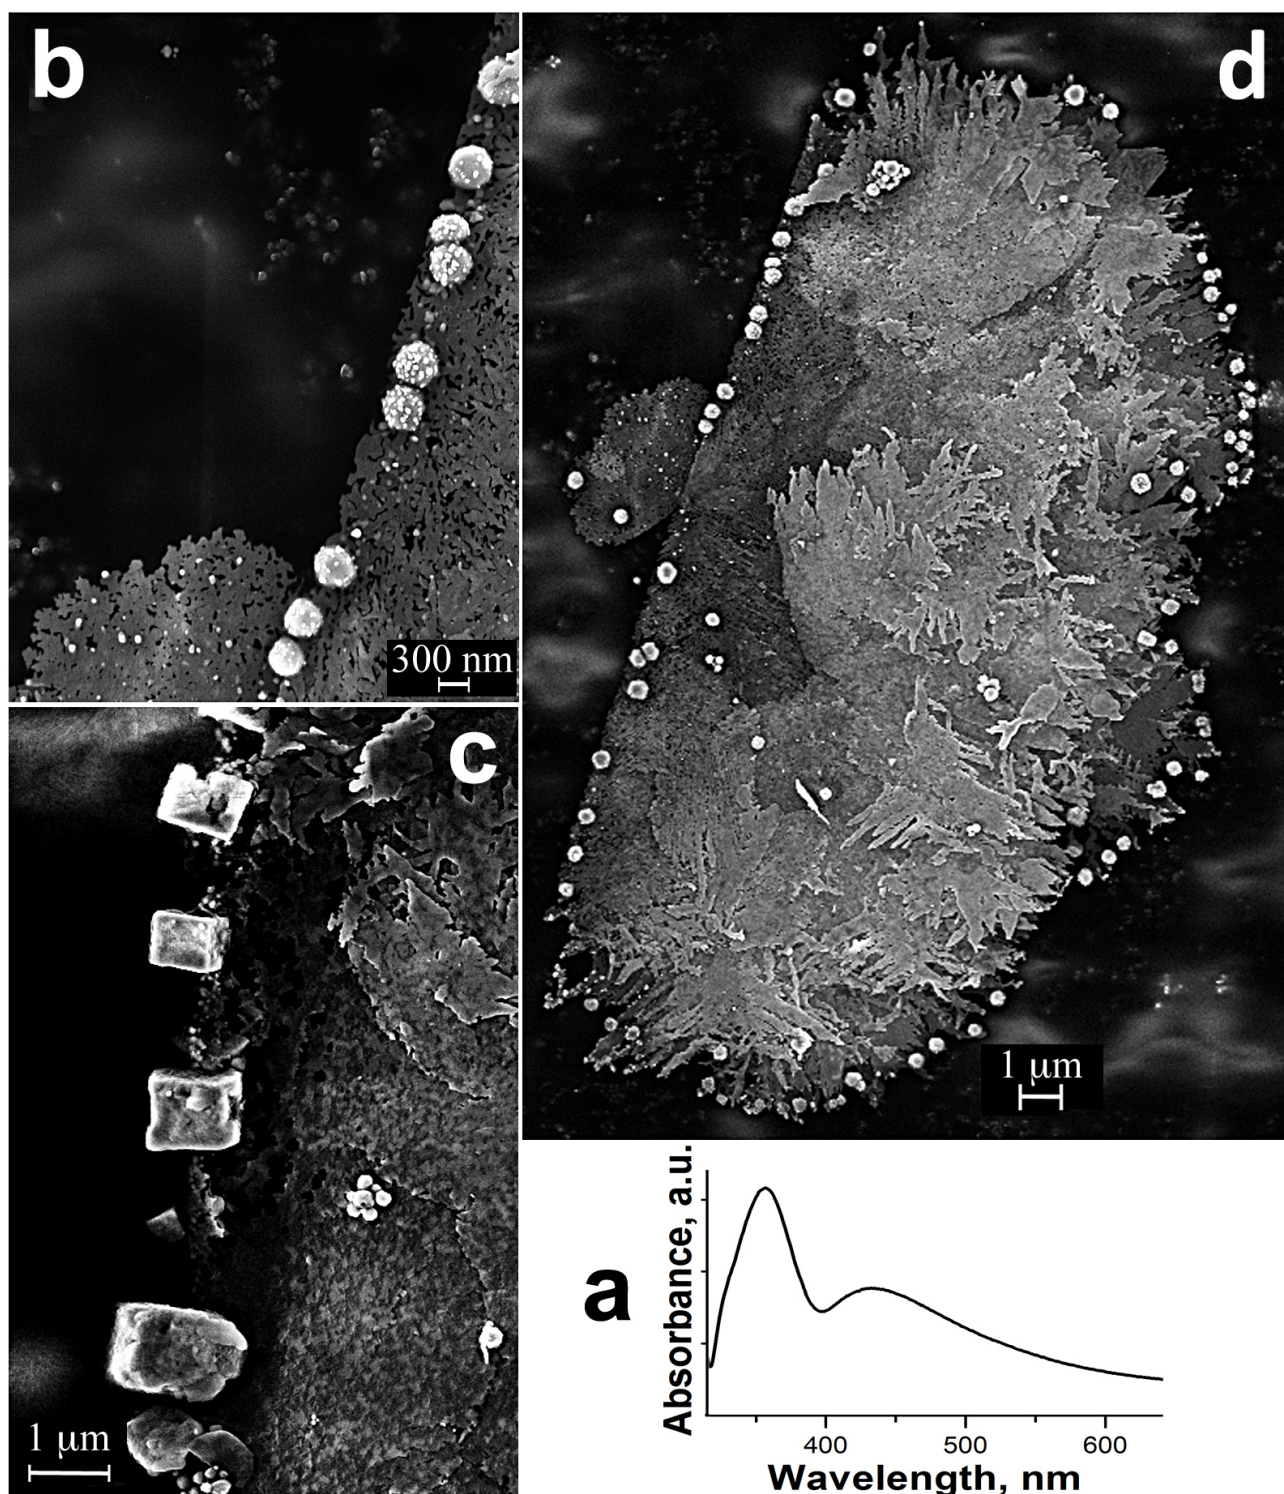

**Fig.S4.** Decomposition of ultrasonic mist of aqueous diamminsilver hydroxide in air at 750 – 950°C. (a) typical plasmonic peaks for a mixture of silver nanoparticles produced from the mist at 950°C (taken from the condensation zone), (b - d) a hierarchic self – assembled planar structure found in a condensed product after mist pyrolysis decorated around its perimeter with AgNPs of spherical (b) or cubic (c) shapes, covered, in turn with smaller AgNPs.
